# Supplementary material
Source: PubMed Central journal article supplement (PMC5226254)
Supplement: NIHMS834750-supplement.pdf [file NIHMS834750-supplement.pdf]

# Indicators of improved water access in the context of schistosomiasis transmission in rural Eastern Region, Ghana

Alexandra V. Kulinkina <sup>a \*</sup>, Karen C. Kosinski <sup>b</sup>, Jeanine D. Plummer <sup>c</sup>, John L. Durant <sup>a</sup>, Kwabena M. Bosompem <sup>d, e</sup>, Michael N. Adjei <sup>f</sup>, Jeffrey K. Griffiths <sup>g</sup>, David M. Gute <sup>a</sup>, Elena N. Naumova <sup>a, g, h</sup>

<sup>a</sup> Department of Civil and Environmental Engineering, Tufts University, 200 College Avenue, Medford, USA

\* Corresponding author; Email: alexandra.kulinkina@tufts.edu

<sup>b</sup> Department of Community Health, Tufts University, 574 Boston Avenue, Medford, USA

<sup>c</sup> Water Quality & Treatment Solutions, Inc., 175A Rice Corner Road, Brookfield, USA

<sup>d</sup> Noguchi Memorial Institute for Medical Research, University of Ghana, P. O. Box 25, Legon, Accra, Ghana

<sup>e</sup> Community Directed Development Foundation, P. O. Box AT2374, Achimota, Accra, Ghana

<sup>f</sup> Unaffiliated, P.O. Box 399, Teshie, Accra, Ghana

<sup>g</sup> Tufts University School of Medicine, 136 Harrison Avenue, Boston, USA

<sup>h</sup> Friedman School of Nutrition Science and Policy, Tufts University, 150 Harrison Avenue, Boston, USA

---

**Table S1:** Comparison of indicator values by district and by population category.

**Table S2:** Spearman's rank correlations between improved water and surface water access indicators.

**Table S1:** Comparison of indicator values by district and by population category.

| Indicator   | Overall      | AKY                  | ATW                 | BRC                 | BRS                 | KBR                 | SKC          | WAK                 | 500 – 999    | 1000 – 1999  | 2000 – 4999           | 5000 – 9999         |
|-------------|--------------|----------------------|---------------------|---------------------|---------------------|---------------------|--------------|---------------------|--------------|--------------|-----------------------|---------------------|
| n           | 74           | 4                    | 12                  | 5                   | 5                   | 13                  | 15           | 20                  | 13           | 29           | 27                    | 5                   |
| Iiws        | 63 (57, 69)  | 47 (20, 74)          | <b>82 (71, 93)</b>  | 57 (28, 87)         | 59 (44, 74)         | 67 (50, 84)         | 63 (49, 77)  | 54 (43, 65)         | 72 (54, 90)  | 63 (54, 71)  | 56 (47, 64)           | 81 (52, 100)        |
| Ifiws       | 49 (43, 55)  | 43 (24, 61)          | <b>66 (52, 81)</b>  | 46 (16, 77)         | 43 (19, 67)         | 55 (40, 70)         | 52 (35, 68)  | 37 (25, 50)         | 58 (40, 75)  | 46 (35, 56)  | 45 (36, 54)           | 70 (48, 92)         |
| Δ           | 14 ***       | 5                    | 16 *                | 11                  | 16 *                | 13 *                | 11 *         | 17 ***              | 14           | 17 ***       | 11 ***                | 11                  |
| Iiws(100)   | 22 (19, 24)  | 15 (3, 27)           | 22 (16, 28)         | 18 (3, 33)          | <b>16 (14, 18)</b>  | 26 (17, 36)         | 22 (15, 29)  | 22 (16, 28)         | 26 (14, 39)  | 20 (17, 23)  | 19 (16, 23)           | 31 (13, 49)         |
| Ifiws(100)  | 18 (15, 20)  | 13 (2, 24)           | 18 (12, 25)         | 16 (-1, 33)         | <b>13 (8, 17)</b>   | 21 (16, 26)         | 19 (12, 26)  | 17 (10, 24)         | 22 (12, 31)  | 16 (12, 20)  | 16 (13, 19)           | 27 (9, 45)          |
| Δ           | 4 ***        | 2                    | 4 **                | 2                   | 3                   | 5                   | 3 *          | 5 **                | 4            | 4 ***        | 3 ***                 | 4                   |
| Iiws(200)   | 57 (52, 61)  | 37 (5, 68)           | 57 (48, 67)         | 54 (24, 84)         | 49 (38, 59)         | 67 (57, 78)         | 58 (45, 71)  | 55 (45, 65)         | 61 (43, 79)  | 55 (50, 61)  | 54 (47, 61)           | 67 (34, 100)        |
| Ifiws(200)  | 48 (43, 54)  | 32 (5, 59)           | 49 (37, 61)         | 49 (11, 87)         | 39 (26, 53)         | <b>60 (50, 71)</b>  | 51 (35, 66)  | 44 (31, 58)         | 55 (38, 72)  | 45 (35, 55)  | 47 (39, 55)           | 62 (27, 96)         |
| Δ           | 8 ***        | 4                    | 9 **                | 5                   | 9                   | 7 *                 | 7            | 11 *                | 6            | 11 **        | 7 ***                 | 5                   |
| Iiws(300)   | 79 (75, 84)  | 54 (10, 98)          | 81 (73, 89)         | 77 (49, 100)        | 76 (67, 84)         | <b>90 (83, 97)</b>  | 79 (65, 94)  | 77 (69, 86)         | 79 (62, 96)  | 80 (74, 85)  | 78 (71, 86)           | 83 (49, 100)        |
| Ifiws(300)  | 70 (63, 76)  | 49 (9, 89)           | 72 (61, 83)         | 71 (30, 100)        | 64 (45, 83)         | <b>84 (73, 95)</b>  | 71 (53, 90)  | 63 (47, 79)         | 75 (58, 93)  | 65 (53, 77)  | 71 (62, 79)           | 79 (40, 100)        |
| Δ           | 9 ***        | 5                    | 8 **                | 7                   | 11                  | 6                   | 8            | 14 *                | 3            | 15 **        | 8 **                  | 4                   |
| Iiws(400)   | 90 (86, 94)  | 65 (26, 100)         | 92 (88, 97)         | 89 (72, 100)        | 92 (87, 98)         | <b>97 (92, 100)</b> | 89 (75, 100) | 89 (83, 95)         | 88 (71, 100) | 92 (88, 95)  | 89 (83, 95)           | 89 (59, 100)        |
| Ifiws(400)  | 81 (75, 87)  | 62 (22, 100)         | 87 (80, 95)         | 82 (48, 100)        | 83 (63, 100)        | <b>92 (83, 100)</b> | 81 (62, 100) | 74 (57, 90)         | 86 (70, 100) | 76 (63, 89)  | 83 (76, 91)           | 86 (52, 100)        |
| Δ           | 9 ***        | 3                    | 5 *                 | 7                   | 10                  | 5                   | 7            | 15                  | 1            | 16 *         | 6 **                  | 3                   |
| Iiws(500)   | 95 (91, 98)  | 76 (48, 100)         | 97 (95, 100)        | 96 (89, 100)        | <b>99 (97, 100)</b> | <b>99 (97, 100)</b> | 92 (78, 100) | 95 (90, 99)         | 91 (75, 100) | 97 (94, 99)  | 94 (91, 98)           | 92 (70, 100)        |
| Ifiws(500)  | 87 (81, 93)  | 74 (41, 100)         | <b>95 (90, 99)</b>  | 88 (63, 100)        | 91 (74, 107)        | 95 (89, 101)        | 86 (66, 100) | 79 (62, 96)         | 91 (74, 100) | 82 (69, 95)  | 90 (85, 95)           | 90 (63, 100)        |
| Δ           | 8 **         | 2                    | 3                   | 8                   | 8                   | 4                   | 6            | 15                  | 0            | 15 *         | 4 *                   | 2                   |
| Iiws(1000)  | 99 (96, 100) | 100 (98, 100)        | 100 (--, --)        | 100 (--, --)        | 100 (--, --)        | 100 (--, --)        | 93 (79, 100) | 100 (--, --)        | 92 (76, 100) | 100 (--, --) | 100 (100, 100)        | 100 (--, --)        |
| Ifiws(1000) | 93 (87, 99)  | <b>100 (98, 100)</b> | <b>100 (--, --)</b> | <b>100 (--, --)</b> | 100 (98, 100)       | <b>100 (--, --)</b> | 87 (67, 100) | 85 (68, 100)        | 92 (76, 100) | 86 (73, 100) | <b>100 (100, 100)</b> | <b>100 (--, --)</b> |
| Δ           | 5 *          | 0                    | 0                   | 0                   | 0                   | 0                   | 7            | 15                  | 0            | 14 *         | 0                     | 0                   |
| Ipsws(100)  | 7 (5, 8)     | <b>1 (0, 3)</b>      | <b>4 (2, 6)</b>     | <b>1 (0, 4)</b>     | <b>2 (0, 4)</b>     | <b>3 (2, 5)</b>     | 10 (5, 16)   | <b>11 (8, 14)</b>   | 7 (1, 13)    | 10 (7, 13)   | <b>4 (2, 5)</b>       | 4 (0, 9)            |
| Ipsws(200)  | 21 (16, 26)  | <b>5 (0, 11)</b>     | 14 (7, 20)          | <b>6 (0, 21)</b>    | <b>7 (0, 18)</b>    | 14 (8, 20)          | 29 (13, 46)  | <b>34 (27, 41)</b>  | 26 (8, 44)   | 28 (20, 35)  | <b>13 (9, 17)</b>     | 13 (0, 29)          |
| Ipsws(300)  | 37 (30, 43)  | <b>14 (1, 27)</b>    | 28 (15, 40)         | 15 (0, 41)          | 17 (0, 41)          | 29 (17, 40)         | 44 (22, 65)  | <b>57 (46, 67)</b>  | 43 (18, 67)  | 46 (36, 57)  | <b>26 (18, 33)</b>    | 26 (0, 56)          |
| Ipsws(400)  | 51 (43, 59)  | 28 (1, 54)           | 43 (25, 61)         | 27 (0, 66)          | 30 (0, 70)          | 45 (29, 62)         | 54 (29, 78)  | <b>74 (62, 85)</b>  | 55 (28, 82)  | 62 (49, 74)  | 40 (30, 51)           | 39 (0, 81)          |
| Ipsws(500)  | 62 (54, 71)  | 43 (0, 86)           | 56 (35, 77)         | 40 (0, 90)          | 43 (0, 92)          | 59 (41, 77)         | 59 (33, 85)  | <b>85 (75, 94)</b>  | 62 (34, 90)  | 72 (60, 84)  | 54 (42, 67)           | 48 (1, 95)          |
| Ipsws(1000) | 85 (77, 92)  | 92 (82, 100)         | 80 (56, 100)        | 67 (16, 100)        | 74 (21, 100)        | 91 (74, 100)        | 69 (45, 94)  | <b>100 (--, --)</b> | 74 (48, 100) | 92 (82, 100) | 84 (71, 96)           | 76 (23, 100)        |

Significant differences between IWS and FIWS with p-values <0.001 are denoted by \*\*\*, <0.01 by \*\*, and <0.05 by \*. Population category specific averages that are significantly different from the overall average (p<0.05) are bolded.

**Table S2:** Spearman’s rank correlations between improved water and surface water access indicators.

|                                                    | $I_{iws}$    | $I_{fiws}$   | $I_{iws(100)}$ | $I_{fiws(100)}$ | $I_{iws(200)}$ | $I_{fiws(200)}$ | $I_{iws(300)}$ | $I_{fiws(300)}$ | $I_{iws(400)}$ | $I_{fiws(400)}$ | $I_{iws(500)}$ | $I_{fiws(500)}$ | $I_{iws(1000)}$ | $I_{fiws(1000)}$ |
|----------------------------------------------------|--------------|--------------|----------------|-----------------|----------------|-----------------|----------------|-----------------|----------------|-----------------|----------------|-----------------|-----------------|------------------|
| <b>FULL DATASET</b>                                |              |              |                |                 |                |                 |                |                 |                |                 |                |                 |                 |                  |
| $I_{psws(100)}$                                    | -0.18        | -0.20        | 0.10           | 0.08            | 0.06           | 0.04            | 0.01           | -0.12           | 0.01           | 0.02            | 0.02           | 0.00            | -0.06           | -0.22            |
| $I_{psws(200)}$                                    | -0.18        | <b>-0.24</b> | 0.11           | 0.09            | 0.09           | 0.08            | 0.05           | -0.10           | 0.02           | 0.04            | 0.05           | 0.06            | -0.01           | -0.20            |
| $I_{psws(300)}$                                    | -0.18        | <b>-0.24</b> | 0.14           | 0.13            | 0.14           | 0.12            | 0.08           | -0.10           | 0.06           | 0.08            | 0.10           | 0.10            | 0.04            | -0.18            |
| $I_{psws(400)}$                                    | -0.19        | <b>-0.26</b> | 0.15           | 0.14            | 0.16           | 0.14            | 0.11           | -0.08           | 0.09           | 0.11            | 0.13           | 0.14            | 0.09            | -0.15            |
| $I_{psws(500)}$                                    | -0.20        | <b>-0.28</b> | 0.16           | 0.16            | 0.18           | 0.16            | 0.13           | -0.05           | 0.10           | 0.13            | 0.16           | 0.17            | 0.12            | -0.12            |
| $I_{psws(1000)}$                                   | -0.11        | -0.20        | 0.13           | 0.11            | 0.12           | 0.14            | 0.13           | 0.04            | 0.09           | 0.11            | 0.14           | 0.18            | 0.14            | -0.04            |
| <b>NO REGULAR PROACTIVE PAYMENT</b>                |              |              |                |                 |                |                 |                |                 |                |                 |                |                 |                 |                  |
| $I_{psws(100)}$                                    | <b>-0.39</b> | <b>-0.39</b> | -0.10          | -0.12           | -0.11          | -0.12           | -0.14          | -0.29           | -0.18          | -0.19           | -0.20          | -0.23           | -0.28           | -0.26            |
| $I_{psws(200)}$                                    | <b>-0.38</b> | <b>-0.43</b> | -0.07          | -0.06           | -0.06          | -0.07           | -0.10          | -0.29           | -0.14          | -0.13           | -0.15          | -0.18           | -0.22           | -0.22            |
| $I_{psws(300)}$                                    | <b>-0.37</b> | <b>-0.40</b> | 0.01           | 0.02            | 0.03           | 0.00            | -0.05          | -0.29           | -0.05          | -0.03           | -0.05          | -0.08           | -0.13           | -0.18            |
| $I_{psws(400)}$                                    | <b>-0.34</b> | <b>-0.39</b> | 0.05           | 0.07            | 0.07           | 0.04            | -0.01          | -0.27           | 0.01           | 0.04            | 0.03           | -0.01           | -0.06           | -0.14            |
| $I_{psws(500)}$                                    | -0.32        | <b>-0.39</b> | 0.11           | 0.13            | 0.14           | 0.11            | 0.04           | -0.21           | 0.07           | 0.10            | 0.10           | 0.08            | 0.02            | -0.07            |
| $I_{psws(1000)}$                                   | <b>-0.34</b> | <b>-0.40</b> | 0.04           | 0.07            | 0.11           | 0.16            | 0.10           | -0.10           | 0.02           | 0.06            | 0.07           | 0.11            | 0.04            | -0.08            |
| <b>REGULAR PROACTIVE PAYMENT</b>                   |              |              |                |                 |                |                 |                |                 |                |                 |                |                 |                 |                  |
| $I_{psws(100)}$                                    | 0.00         | -0.06        | 0.27           | 0.30            | 0.23           | 0.23            | 0.17           | 0.05            | 0.25           | 0.28            | 0.29           | 0.31            | 0.23            | -0.12            |
| $I_{psws(200)}$                                    | -0.02        | -0.10        | 0.25           | 0.26            | 0.21           | 0.24            | 0.20           | 0.08            | 0.23           | 0.25            | 0.28           | <b>0.34</b>     | 0.27            | -0.12            |
| $I_{psws(300)}$                                    | -0.03        | -0.13        | 0.22           | 0.25            | 0.22           | 0.26            | 0.22           | 0.12            | 0.20           | 0.22            | 0.28           | <b>0.34</b>     | 0.29            | -0.10            |
| $I_{psws(400)}$                                    | -0.07        | -0.16        | 0.19           | 0.22            | 0.21           | 0.26            | 0.24           | 0.13            | 0.19           | 0.21            | 0.27           | <b>0.34</b>     | 0.31            | -0.08            |
| $I_{psws(500)}$                                    | -0.11        | -0.22        | 0.19           | 0.20            | 0.21           | 0.26            | 0.24           | 0.14            | 0.18           | 0.19            | 0.25           | 0.31            | 0.30            | -0.09            |
| $I_{psws(1000)}$                                   | 0.11         | -0.02        | 0.20           | 0.17            | 0.10           | 0.13            | 0.14           | 0.16            | 0.19           | 0.17            | 0.20           | 0.23            | 0.22            | 0.04             |
| <b>NO REPORTED WATER QUALITY PROBLEMS</b>          |              |              |                |                 |                |                 |                |                 |                |                 |                |                 |                 |                  |
| $I_{psws(100)}$                                    | -0.21        | -0.20        | 0.04           | -0.01           | -0.11          | -0.09           | -0.07          | --              | -0.01          | -0.06           | -0.10          | -0.06           | -0.12           | -0.22            |
| $I_{psws(200)}$                                    | -0.18        | -0.23        | 0.00           | -0.05           | -0.14          | -0.13           | -0.10          | --              | -0.04          | -0.09           | -0.11          | -0.06           | -0.12           | -0.20            |
| $I_{psws(300)}$                                    | -0.18        | -0.22        | 0.09           | 0.01            | -0.09          | -0.10           | -0.07          | --              | 0.03           | -0.02           | -0.04          | 0.00            | -0.07           | -0.20            |
| $I_{psws(400)}$                                    | -0.17        | -0.20        | 0.09           | 0.03            | -0.07          | -0.09           | -0.06          | --              | 0.07           | 0.02            | 0.00           | 0.04            | -0.02           | -0.14            |
| $I_{psws(500)}$                                    | -0.22        | -0.27        | 0.08           | 0.00            | -0.08          | -0.09           | -0.06          | --              | 0.07           | 0.01            | 0.01           | 0.04            | 0.00            | -0.11            |
| $I_{psws(1000)}$                                   | -0.16        | -0.33        | -0.01          | -0.14           | -0.21          | -0.20           | -0.16          | --              | -0.03          | -0.10           | -0.10          | -0.04           | -0.11           | -0.13            |
| <b>ONE REPORTED WATER QUALITY PROBLEM</b>          |              |              |                |                 |                |                 |                |                 |                |                 |                |                 |                 |                  |
| $I_{psws(100)}$                                    | -0.20        | -0.34        | 0.10           | 0.06            | 0.11           | 0.07            | 0.09           | -0.31           | 0.04           | 0.04            | 0.06           | 0.03            | 0.01            | -0.19            |
| $I_{psws(200)}$                                    | -0.19        | <b>-0.36</b> | 0.16           | 0.12            | 0.16           | 0.12            | 0.10           | -0.31           | 0.07           | 0.07            | 0.08           | 0.05            | 0.02            | -0.20            |
| $I_{psws(300)}$                                    | -0.21        | <b>-0.36</b> | 0.20           | 0.18            | 0.24           | 0.20            | 0.15           | -0.31           | 0.11           | 0.12            | 0.15           | 0.12            | 0.09            | -0.19            |
| $I_{psws(400)}$                                    | -0.23        | <b>-0.37</b> | 0.22           | 0.20            | 0.26           | 0.24            | 0.18           | -0.29           | 0.13           | 0.14            | 0.18           | 0.15            | 0.12            | -0.20            |
| $I_{psws(500)}$                                    | -0.24        | <b>-0.38</b> | 0.24           | 0.23            | 0.30           | 0.29            | 0.21           | -0.22           | 0.15           | 0.17            | 0.22           | 0.19            | 0.17            | -0.17            |
| $I_{psws(1000)}$                                   | -0.12        | -0.22        | 0.25           | 0.25            | 0.32           | <b>0.37</b>     | 0.30           | -0.11           | 0.20           | 0.23            | 0.28           | 0.29            | 0.28            | -0.07            |
| <b>TWO OR MORE REPORTED WATER QUALITY PROBLEMS</b> |              |              |                |                 |                |                 |                |                 |                |                 |                |                 |                 |                  |
| $I_{psws(100)}$                                    | -0.03        | -0.02        | 0.05           | 0.21            | 0.11           | 0.11            | 0.07           | 0.21            | -0.08          | 0.07            | -0.02          | -0.06           | -0.14           | -0.14            |
| $I_{psws(200)}$                                    | 0.00         | -0.19        | 0.09           | 0.25            | 0.26           | 0.22            | 0.18           | 0.21            | -0.02          | 0.10            | 0.08           | 0.09            | -0.05           | -0.12            |
| $I_{psws(300)}$                                    | -0.01        | -0.20        | 0.08           | 0.24            | 0.29           | 0.24            | 0.19           | 0.21            | -0.04          | 0.10            | 0.11           | 0.12            | -0.03           | -0.12            |
| $I_{psws(400)}$                                    | -0.03        | -0.26        | 0.09           | 0.27            | 0.34           | 0.31            | 0.29           | 0.26            | -0.02          | 0.15            | 0.18           | 0.20            | 0.07            | -0.06            |
| $I_{psws(500)}$                                    | 0.00         | -0.20        | 0.10           | 0.27            | 0.33           | 0.28            | 0.28           | 0.26            | 0.03           | 0.23            | 0.24           | 0.25            | 0.13            | 0.02             |
| $I_{psws(1000)}$                                   | -0.08        | -0.10        | -0.02          | 0.19            | 0.26           | 0.30            | 0.33           | 0.35            | -0.05          | 0.20            | 0.25           | 0.30            | 0.25            | 0.14             |
